# Supplementary material for: Particle Size Dependence of Biogenic Secondary Organic Aerosol Molecular Composition
Source: Copernicus journal article supplement (doi:10.5194/acp-2017-53), 2017-01-30
Supplement: Supplementary file 1 [file acp-2017-53-supplement.pdf]

1 **Supporting Information for: Particle Size Dependence of**  
2 **Biogenic Secondary Organic Aerosol Molecular Composition**

3 Peijun Tu<sup>1</sup>, Murray V. Johnston<sup>2</sup>

4 <sup>1,2</sup>Department of Chemistry and Biochemistry, University of Delaware, Newark, Delaware 19716, USA

5 Correspondence to: Murray V. Johnston ([mvj@udel.edu](mailto:mvj@udel.edu))

6  
7

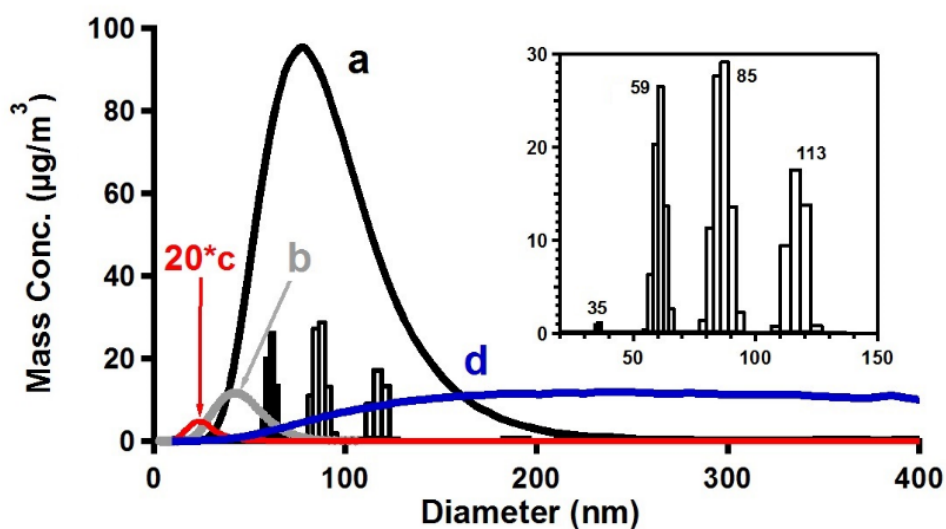

8

9 **Figure S1.** Size distributions of polydisperse SOA samples produced from the flow tube reactor (a, b, c)  
10 and atomizer (d) monitored with SMPS. Size distributions of monodisperse SOA obtained from  
11 polydisperse sample (a) are also shown. The mass concentration of polydisperse SOA sample (c) was  
12 multiplied by a factor of 20 to fit on this scale. The mass concentration of the 35 nm monodisperse  
13 sample in the inset was multiplied by a factor of 40.

14

15

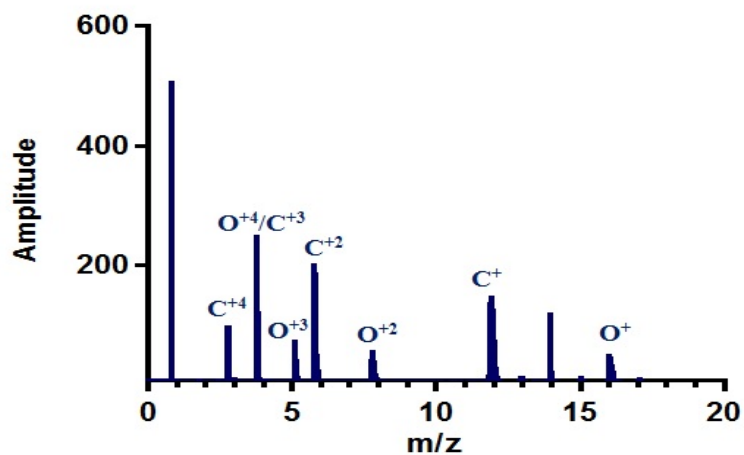

1  
 2 **Figure S2.** Average NAMS spectrum of 150 single particle spectra from polydisperse SOA sample (a).

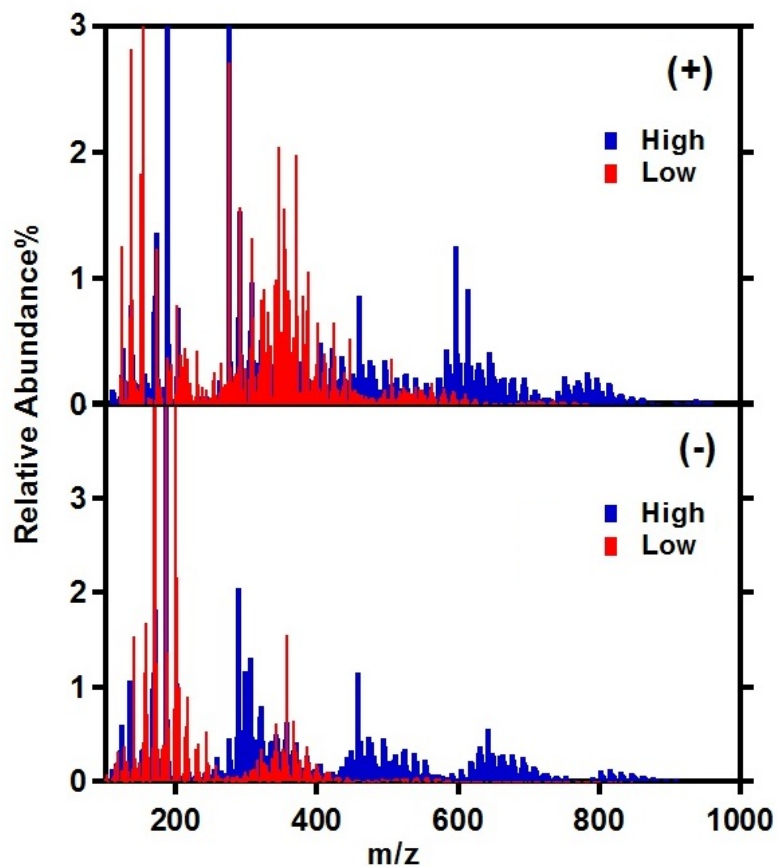

3  
 4 **Figure S3.** Positive (+) and negative (-) ion mass spectra of high (red; polydisperse sample a) and low  
 5 (red; polydisperse sample c) mass loading SOA averaged over 5 replicate measurements.

6

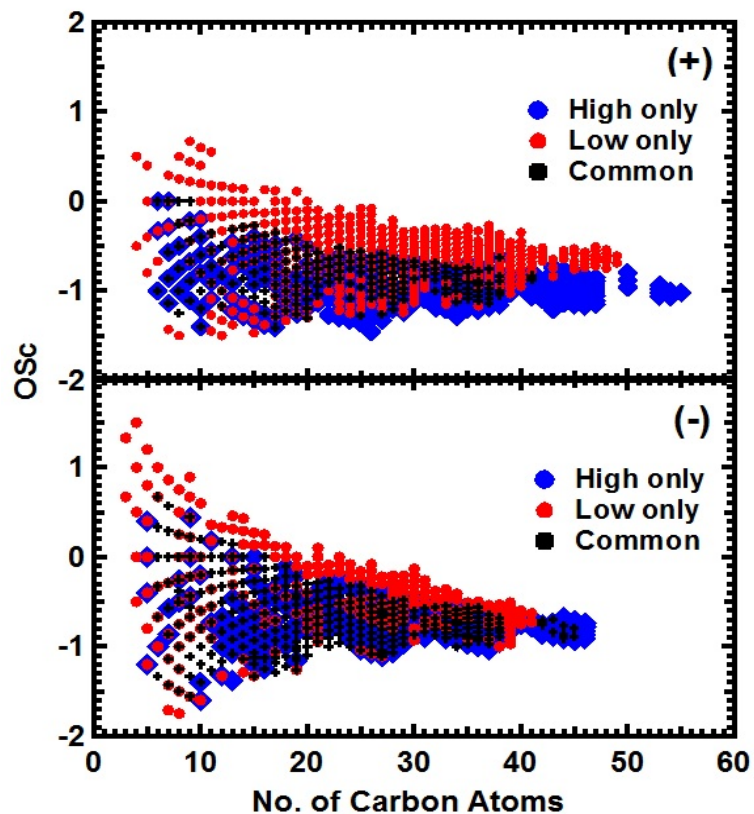

1  
 2 **Figure S4.** Carbon oxidation state (OSc) vs. number of carbon atoms for assigned molecular formulas  
 3 from the positive (+) and negative (-) ion mass spectra of low and high mass loading polydisperse SOA  
 4 samples. Unique formulas in the low mass loading samples are shown in red. Unique formulas in the  
 5 high mass loading samples are shown in blue. Formulas common to both samples are shown in black  
 6

1 **Table S1.** SOA Samples Investigated in this Study

| Sample Type    | SOA Generation    | Avg. Mode Diameter (nm) | Surface-to-Volume Ratio (nm <sup>-1</sup> ) | Avg. Mass. Concentration (μg/m <sup>3</sup> ) | Time Required for 10μg sample to be Collected (hr) |
|----------------|-------------------|-------------------------|---------------------------------------------|-----------------------------------------------|----------------------------------------------------|
| Polydisperse a | Flow Tube Reactor | 76                      | 0.08                                        | 2300                                          | 0.07                                               |
| 35 nm          |                   | 35                      | 0.17                                        | 5                                             | 34                                                 |
| 60 nm          |                   | 59                      | 0.10                                        | 66                                            | 2.5                                                |
| 85 nm          |                   | 85                      | 0.07                                        | 87                                            | 1.9                                                |
| 110 nm         |                   | 113                     | 0.05                                        | 48                                            | 3.5                                                |
| Polydisperse b |                   | 43                      | 0.14                                        | 240                                           | 0.69                                               |
| Polydisperse c |                   | 23                      | 0.26                                        | 5                                             | 33                                                 |
| Polydisperse d | Atomizer          | 240                     | N/A                                         | 510                                           | 0.33                                               |
| 35 nm          |                   | 35                      | 0.17                                        | 2                                             | 93                                                 |
| 60 nm          |                   | 62                      | 0.10                                        | 23                                            | 7.3                                                |
| 110 nm         |                   | 112                     | 0.05                                        | 20                                            | 8.3                                                |

2

3

1 **Table S2.** Summary of Off-Line Composition Measurements with HR-MS

| Sample Type         | Ion Mode | Unique Molecular Formulas | Avg. SI | Avg. RSD% | Avg. O/C     |
|---------------------|----------|---------------------------|---------|-----------|--------------|
| Polydisperse a      | (+)      | 1203 ± 108                | 5.8E+06 | 6.8       | 0.28 ± 0.01  |
|                     | (-)      | 1035 ± 89                 | 7.9E+06 | 3.3       | 0.41 ± 0.004 |
| 35 nm <sup>a</sup>  | (+)      | 897 ± 82                  | 3.6E+06 | 5.1       | 0.36 ± 0.01  |
|                     | (-)      | 459 ± 78                  | 3.1E+06 | 9.8       | 0.51 ± 0.01  |
| 60 nm <sup>a</sup>  | (+)      | 1179 ± 111                | 8.3E+06 | 6.0       | 0.32 ± 0.02  |
|                     | (-)      | 405 ± 52                  | 8.5E+06 | 13        | 0.48 ± 0.01  |
| 85 nm <sup>a</sup>  | (+)      | 1097 ± 152                | 8.9E+06 | 7.8       | 0.31 ± 0.02  |
|                     | (-)      | 420 ± 38                  | 5.0E+06 | 13        | 0.46 ± 0.01  |
| 110 nm <sup>a</sup> | (+)      | 1644 ± 191                | 5.2E+06 | 7.1       | 0.23 ± 0.01  |
|                     | (-)      | 587 ± 54                  | 6.0E+06 | 9.8       | 0.44 ± 0.01  |
| Polydisperse b      | (+)      | 1115 ± 156                | 3.4E+06 | 7.5       | 0.31 ± 0.02  |
|                     | (-)      | 847 ± 45                  | 6.5E+06 | 4.2       | 0.42 ± 0.01  |
| Polydisperse c      | (+)      | 1047 ± 103                | 2.5E+06 | 11        | 0.34 ± 0.01  |
|                     | (-)      | 743 ± 55                  | 8.3E+06 | 5.6       | 0.47 ± 0.02  |
| Polydisperse d      | (+)      | 1029 ± 83                 | 5.9E+06 | 3.8       | 0.31 ± 0.02  |
|                     | (-)      | 896 ± 77                  | 7.8E+06 | 10        | 0.51 ± 0.01  |
| 35 nm <sup>b</sup>  | (+)      | 430 ± 33                  | 1.9E+06 | 6.7       | 0.37 ± 0.01  |
|                     | (-)      | 226 ± 28                  | 8.6E+06 | 2.7       | 0.47 ± 0.01  |
| 85 nm <sup>b</sup>  | (+)      | 914 ± 86                  | 7.1E+05 | 5.4       | 0.35 ± 0.01  |
|                     | (-)      | 552 ± 46                  | 3.9E+05 | 2.8       | 0.45 ± 0.01  |
| 110 nm <sup>b</sup> | (+)      | 873 ± 51                  | 6.3E+05 | 2.6       | 0.36 ± 0.01  |
|                     | (-)      | 439 ± 25                  | 4.3E+05 | 7.7       | 0.45 ± 0.01  |

2 <sup>a</sup>Monodisperse samples were classified from polydisperse SOA sample (a).

3 <sup>b</sup>Monodisperse samples were classified from polydisperse SOA sample (d).

1 **Table S3.** Summary of On-Line Measurements with NAMS

| Sample Type         | Poly/Mono | Avg. O/C | Std. dev <sub>O/C</sub> |
|---------------------|-----------|----------|-------------------------|
| Poly SOA a          | poly      | 0.35     | 9.8E-03                 |
| Poly SOA b          | poly      | 0.40     | 1.5E-02                 |
| Poly SOA (atomizer) | poly      | 0.45     | 8.6E-03                 |
| 60 nm               | Mono      | 0.42     | 1.4E-02                 |
| 85 nm               | Mono      | 0.35     | 1.3E-02                 |
| 110 nm              | Mono      | 0.33     | 5.5E-03                 |
| 85 nm (atomizer)    | Mono      | 0.45     | 1.9E-03                 |
| 110nm (atomizer)    | Mono      | 0.46     | 3.6E-03                 |

2
